# Supplementary material for: Lacticaseibacillus rhamnosus HF01 fermented yogurt alleviated high-fat diet-induced obesity and hepatic steatosis via the gut microbiota–butyric acid–hepatic lipid metabolism axis
Source: Royal Society of Chemistry journal article supplement (doi:10.1039/d3fo04985j), 2024-01-01
Supplement: d3fo04985j2.pdf [file d3fo04985j2.pdf]

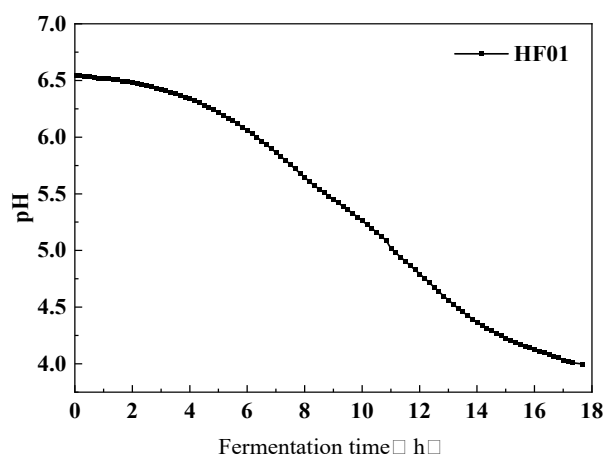

**Fig.S1** pH changes during the fermentation of *Lactocaseibacillus rhamnosus* HF01

**Table S1.** Tolerance of *Lactocaseibacillus rhamnosus* HF01 to bile salt

| Bile salt content (%) | Strain survival rate (%) |
|-----------------------|--------------------------|
| 0.1                   | 72.31±1.24               |
| 0.2                   | 66.25±1.34               |
| 0.3                   | 57.58±1.25               |
| 0.4                   | 52.1±1.23                |
| 0.5                   | 50.24±1.41               |

**Table S2.** Tolerance of *Lactocaseibacillus rhamnosus* HF01 to acid

| pH     | Strain survival rate (%) |
|--------|--------------------------|
| pH 2   | 0                        |
| pH 2.5 | 68.25±1.18               |
| pH 3   | 71.36±1.01               |
| pH 3.5 | 96.21±0.87               |
| pH 4   | 97.63±0.56               |
