# Supplementary figures and images for: Lacticaseibacillus rhamnosus HF01 fermented yogurt alleviated high-fat diet-induced obesity and hepatic steatosis via the gut microbiota–butyric acid–hepatic lipid metabolism axis
Source: Royal Society of Chemistry journal article supplement (doi:10.1039/d3fo04985j), 2024-01-01

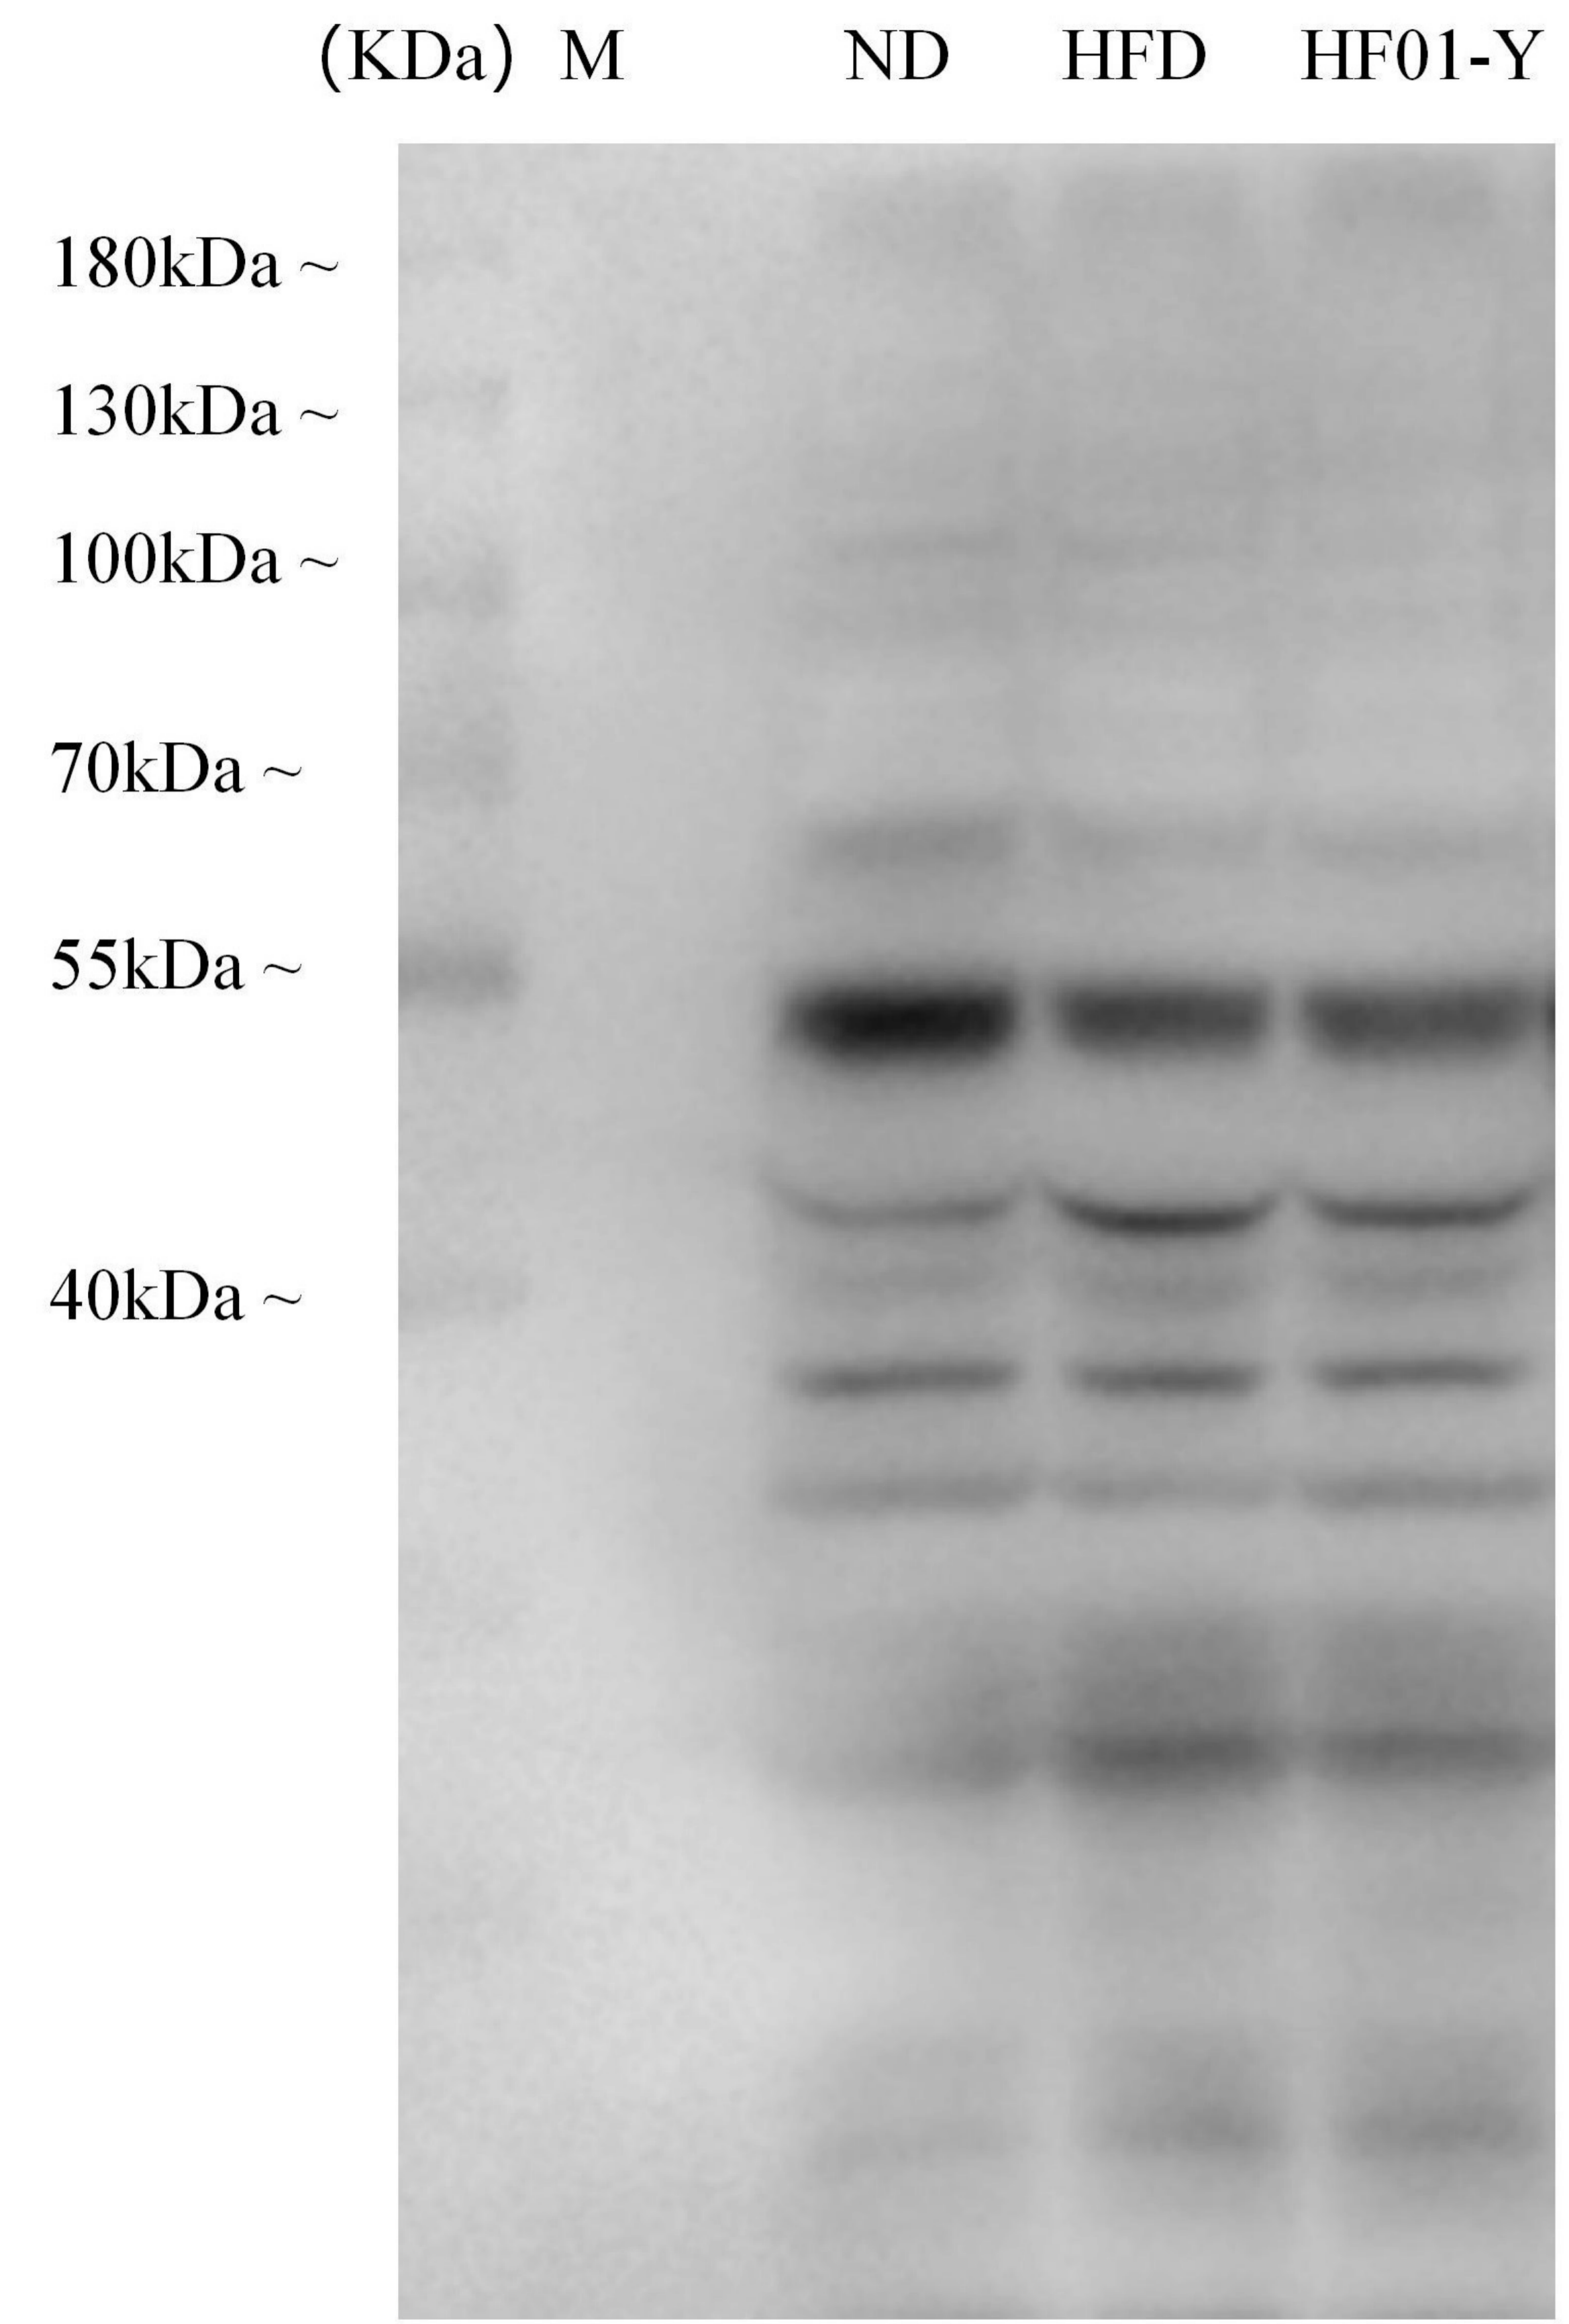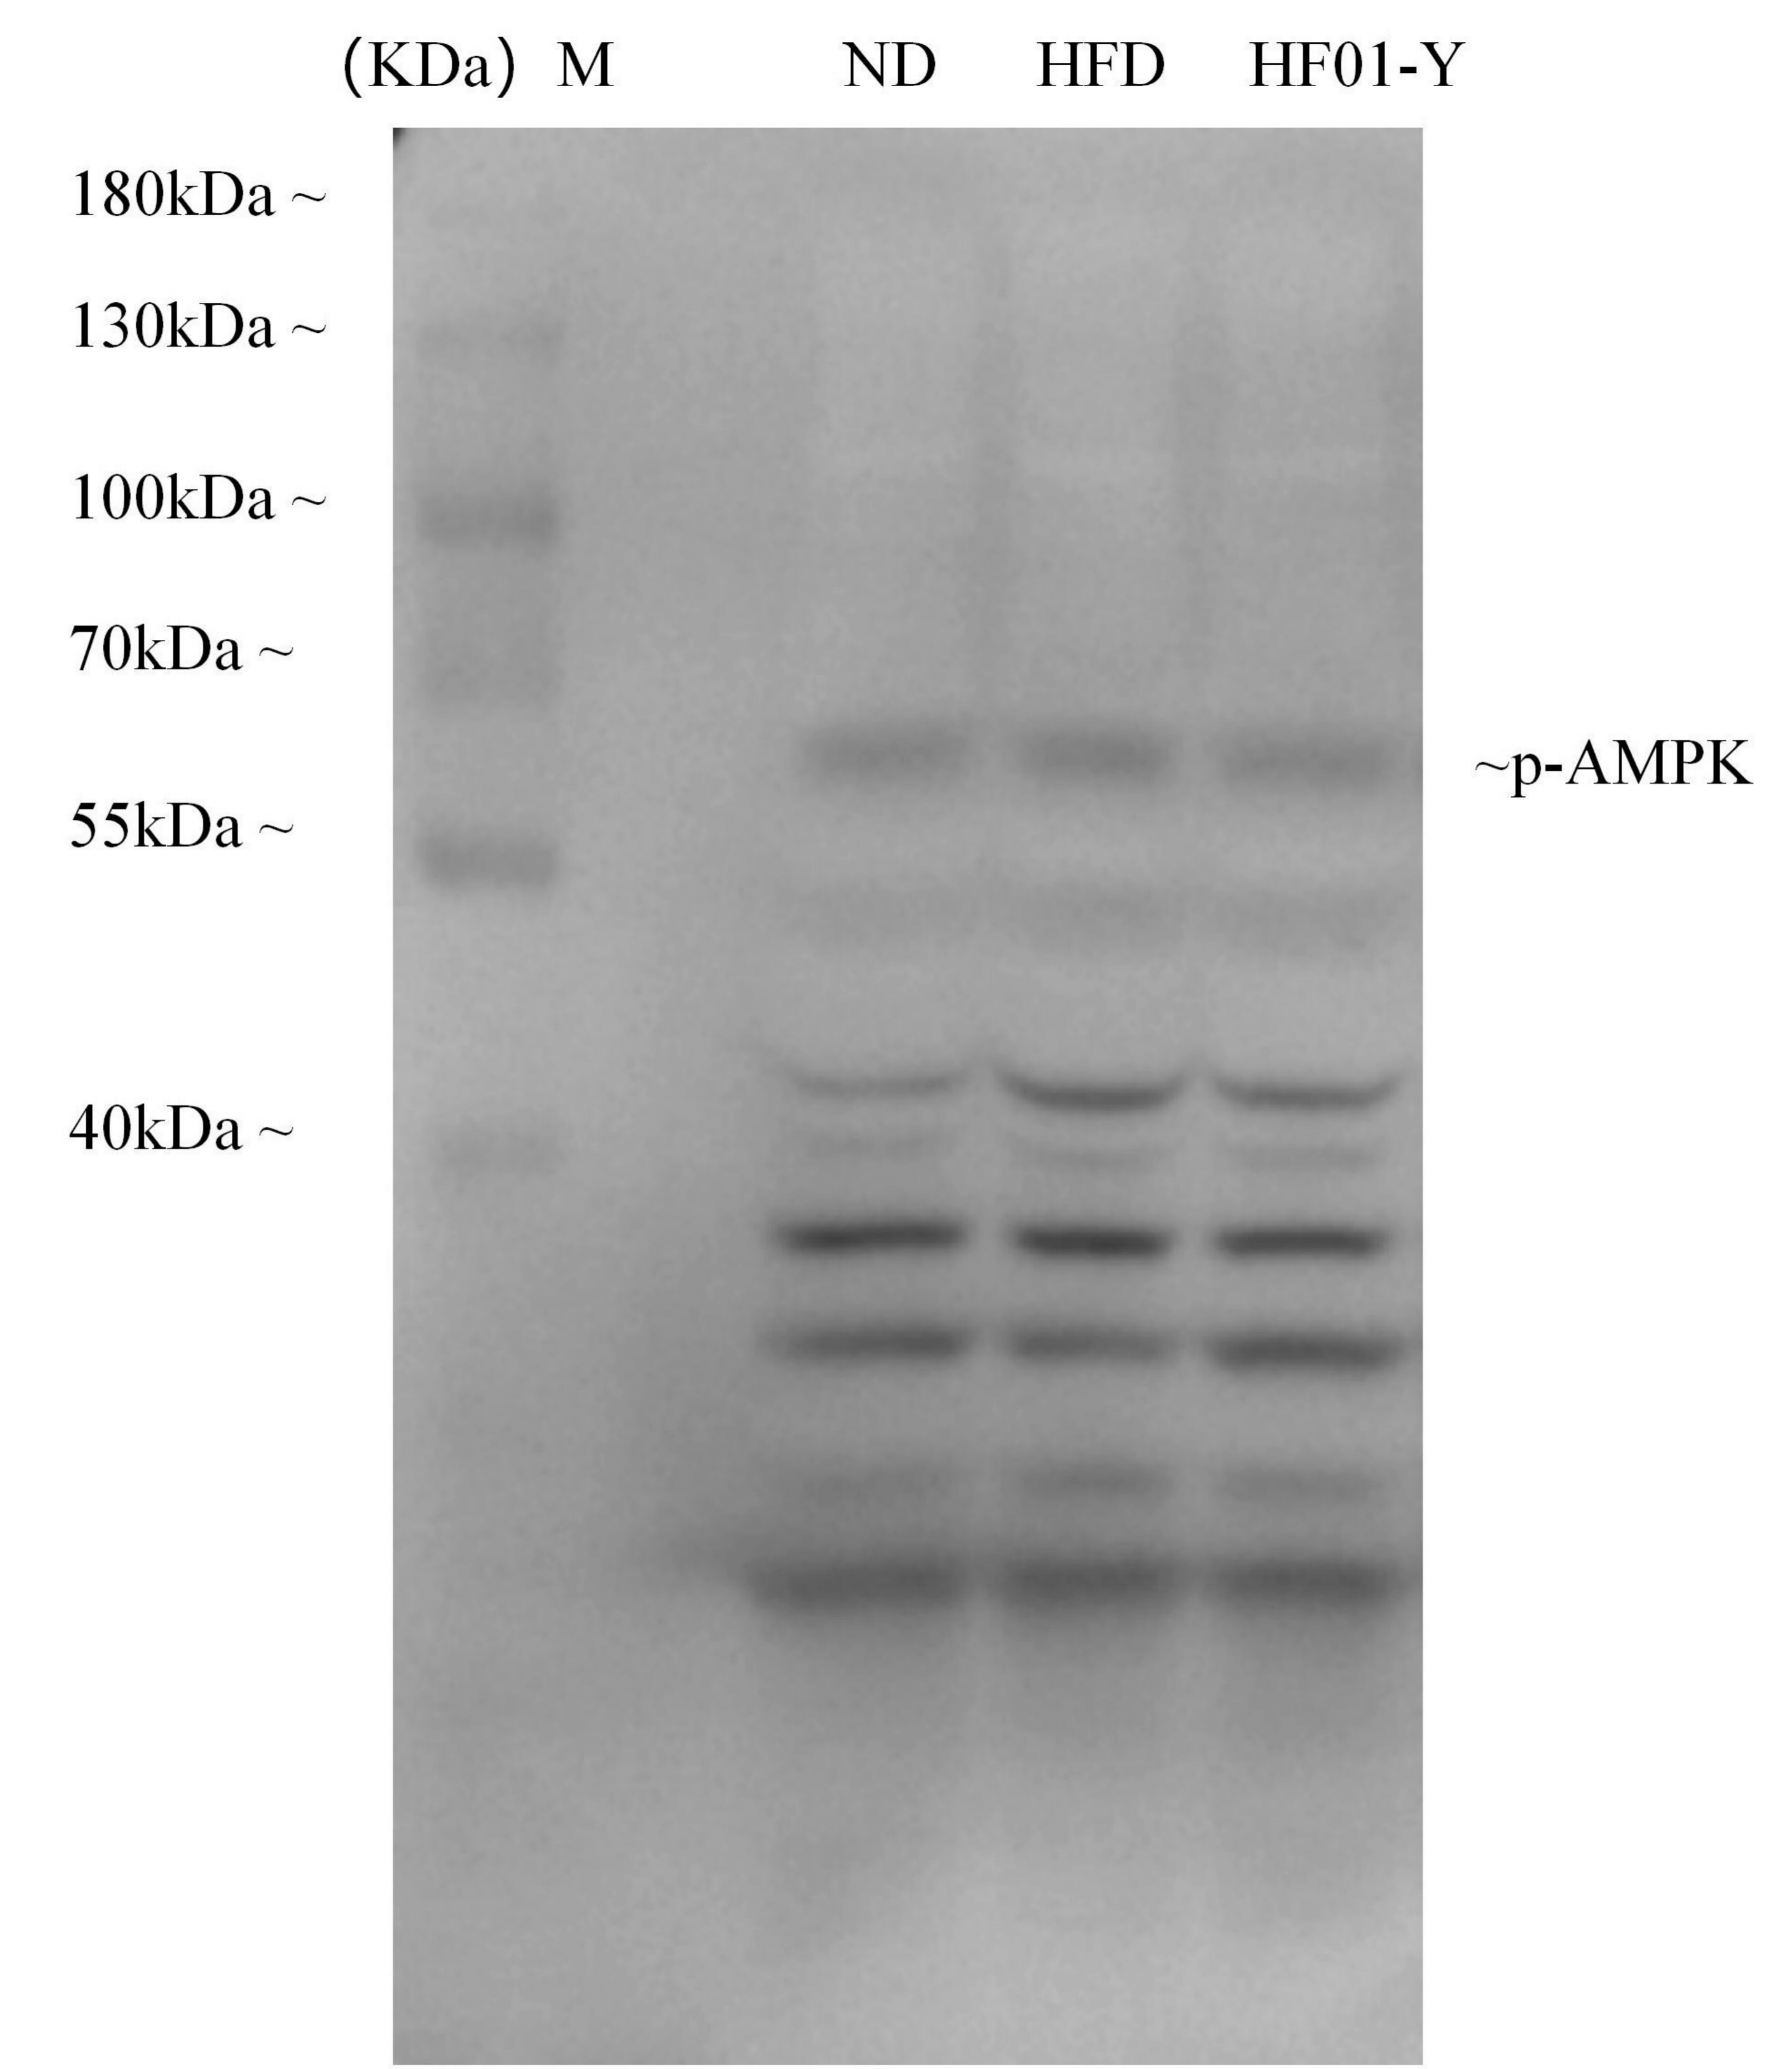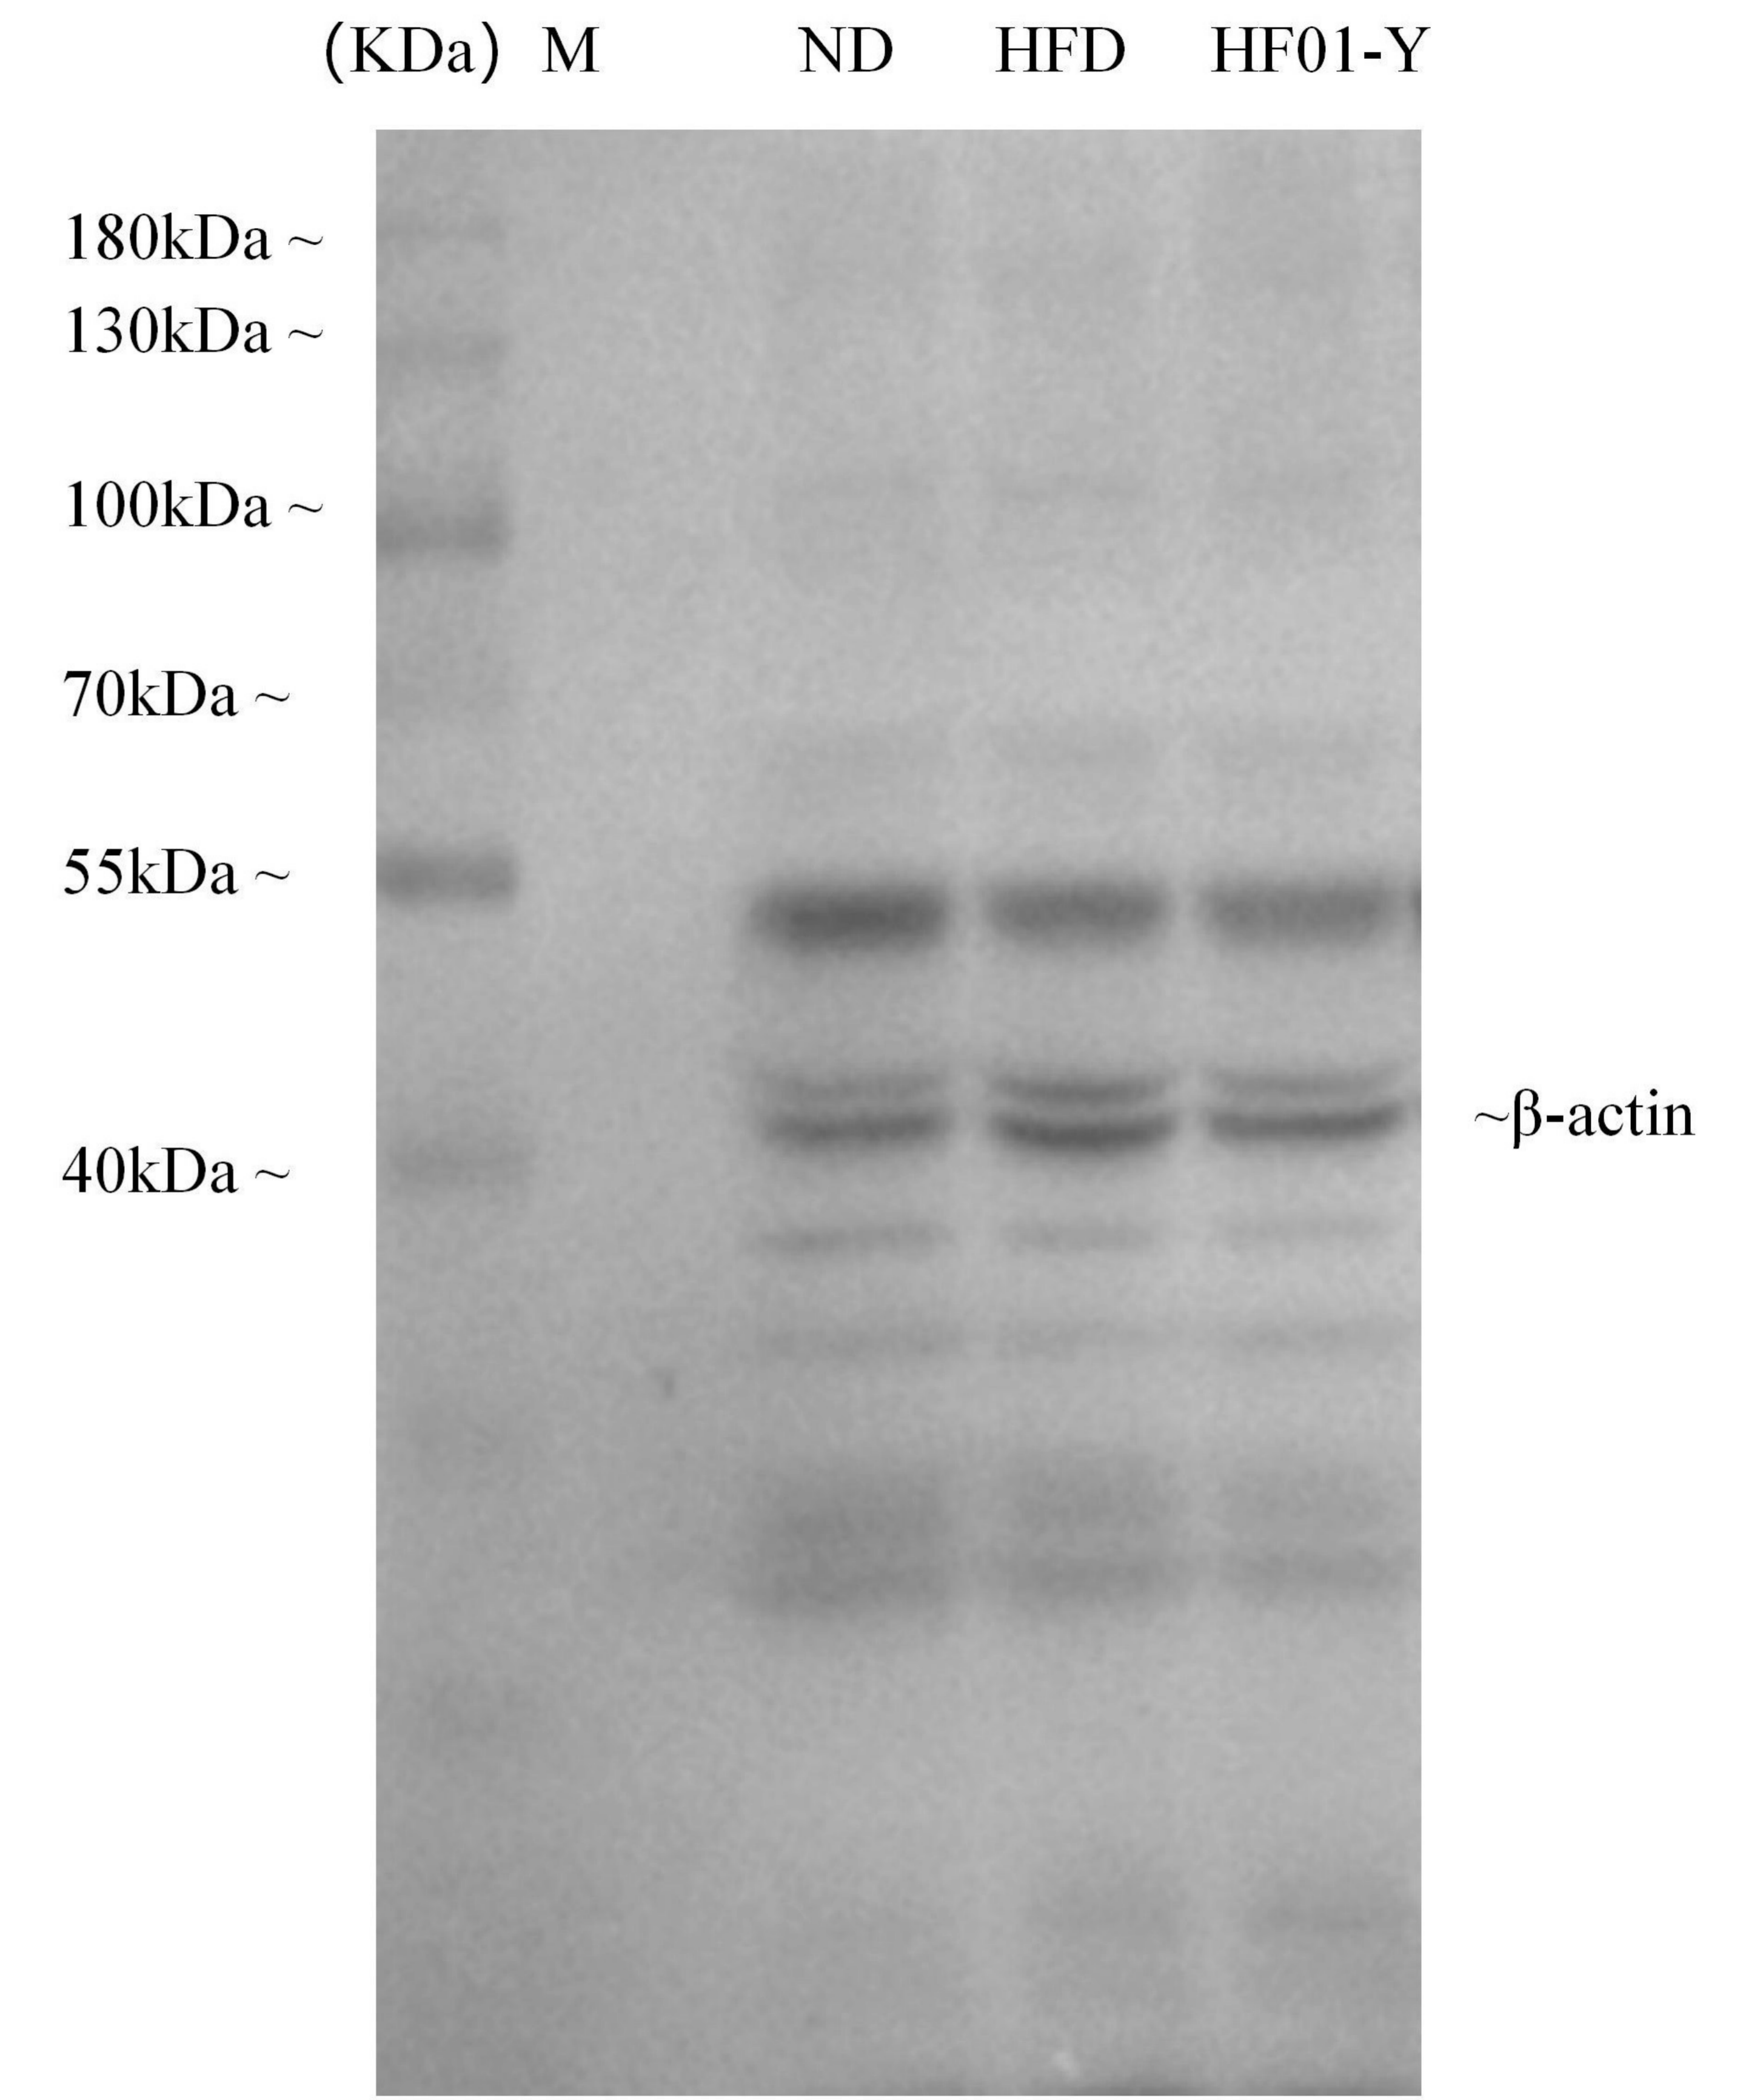

Supplement: d3fo04985j1.pdf [file d3fo04985j1.pdf]
